# Supplementary material for: Antimicrobial Resistance and Pathogenicity of Aliarcobacter butzleri Isolated from Poultry Meat
Source: MDPI journal article supplement (doi:10.3390/antibiotics12020282), 2023-02-01
Supplement: s1 [file s1]

**Table S1.** Minimum inhibitory concentration (MIC) values of antimicrobials assessed against 27 strains of *Alarcobacter butzleri* isolated from commercial chicken meat from São Paulo, Brazil.

| Antimicrobial  | Number of strains according to MIC (µg/mL) |      |      |      |      |     |   |    |    |          |          |           |           |     | MIC <sub>50</sub> | MIC <sub>90</sub> | %R   |
|----------------|--------------------------------------------|------|------|------|------|-----|---|----|----|----------|----------|-----------|-----------|-----|-------------------|-------------------|------|
|                | ≤0.015                                     | 0.03 | 0.06 | 0.12 | 0.25 | 0.5 | 1 | 2  | 4  | 8        | 16       | 32        | 64        | >64 |                   |                   |      |
| Azithromycin   | 0                                          | 0    | 0    | 0    | 0    | 8   | 8 | 4  | 4  | 0        | <b>1</b> | <b>2</b>  | 0         | 0   | 1.0               | 16                | 11.1 |
| Ciprofloxacin  | 0                                          | 0    | 14   | 6    | 3    | 2   | 0 | 0  | 0  | 0        | <b>1</b> | <b>1</b>  | 0         | 0   | 0.06              | 0.5               | 7.4  |
| Erythromycin   |                                            | 0    | 0    | 0    | 0    | 0   | 2 | 13 | 10 | 1        | 0        | <b>1</b>  | 0         | 0   | 2                 | 4                 | 3.7  |
| Gentamicin     |                                            |      |      | 1    | 25   | 1   | 0 | 0  | 0  | 0        | 0        | 0         | 0         | 0   | 0.25              | 0.25              | 0    |
| Tetracycline   |                                            |      | 0    | 0    | 0    | 0   | 5 | 13 | 8  | 0        | <b>1</b> | 0         | 0         | 0   | 2                 | 4                 | 3.7  |
| Florfenicol    |                                            | 0    | 0    | 0    | 0    | 0   | 0 | 0  | 10 | <b>1</b> | <b>6</b> | <b>10</b> | 0         | 0   | 16                | 32                | 62.9 |
| Nalidixic acid |                                            |      |      |      |      |     |   |    | 0  | 2        | 3        | 6         | <b>16</b> | 0   | 64                | 64                | 59.2 |
| Telithromycin  | 0                                          | 0    | 0    | 0    | 0    | 0   | 7 | 18 | 1  | <b>1</b> | 0        | 0         | 0         | 0   | 2                 | 2                 | 3.7  |
| Clindamycin    |                                            | 0    | 0    | 0    | 0    | 0   | 0 | 1  | 5  | <b>5</b> | <b>8</b> | <b>8</b>  | 0         | 0   | 16                | 32                | 77.2 |

\*Gray cells are untested values; the sidebar indicates the breakpoints. Resistant strains were in bold. MIC<sub>50</sub> and MIC<sub>90</sub> values are those that inhibit 50% and 90% of tested strains. %R = % of resistant strains
